# Supplementary material
Source: PubMed Central journal article supplement (PMC3105655)
Supplement: 2010.039321_2.pdf [file 2010.039321_2.pdf]

**Manuscript no. HAEMATOL/2010/039321 entitled “Outcome of patients with chronic myeloid leukemia with multiple ABL1 kinase domain mutations receiving tyrosine kinase inhibitor therapy“**

**Authors: Quintas-Cardama A., Kantarjian H, O’Brien S, Jabbour E., Borthakur G., Ravandi F., Verstovsek S., Shan J., Cortes J.**

**Information about the contributions of each person named as having participated in the study**

- 1) Guarantor(s)**, i.e., person(s) who is (are) responsible for the integrity of the work as a whole:
- Farhad Ravandi, UT-MDACC, fravandi@mdanderson.org
  - Alfonso Quintas-Cardama, UT-MDACC, aquintas@mdanderson.org
  - Jorges Cortes, UT-MDACC, jcortes@mdanderson.org

According to the International Committee of Medical Journal Editors (ICMJE) ([http://www.icmje.org/ethical\\_1author.html](http://www.icmje.org/ethical_1author.html)): “*Authorship credit should be based on: 1) substantial contributions to conception and design, acquisition of data, or analysis and interpretation of data; 2) drafting the article or revising it critically for important intellectual content; and 3) final approval of the version to be published. Authors should meet conditions 1, 2, and 3 ..... Acquisition of funding, collection of data, or general supervision of the research group alone does not constitute authorship*”.

**The guarantors of this manuscript confirm that all persons designated as authors qualify for authorship, and that each author has participated sufficiently in the work to take public responsibility for appropriate portions of the content.**

**2) Authors who participated in the conception of the study:** Quintas-Cardama A., Kantarjian H, O’Brien S, Jabbour E., Borthakur G., Ravandi F., Verstovsek S., Shan J., Cortes J.

**3) Design & Methods.** The following authors were responsible for specific investigations (please detail):

- Farhad Ravandi, Provision of Patients and material review of manuscript and approval
- Alfonso Quintas-Cardama designed research
- Jorge Cortes designed research
- Jenny Shan designed research

**4) Results.** The following authors were responsible for specific portions of the results, including figures and tables (please indicate the person responsible for each figure and each table):

- Alfonso Quintas-Cardama and Jenny Shan were responsible for all the figures and tables

**5) Writing the manuscript.** The following authors were responsible for writing the manuscript:

- Alfonso Quintas-Cardam and Jorge Cortes wrote the paper

**6) Contributors Listed in Acknowledgments:** (Examples of those who might be acknowledged include a person who provided purely technical help, writing assistance, or a department chair who provided only general support. Corresponding authors must declare whether they had assistance with the study design, data collection, data analysis, or manuscript preparation. If such assistance was available, the authors must disclose the identity of the individuals who provided this assistance and the entity that supported it. Financial and material support should also be acknowledged.)

None
